# Supplementary material
Source: Research Square preprint supplement (doi:10.21203/rs.3.rs-10020548/v1)
Supplement: Supplementary file 1 [file 794290721c3bec24d4ce3008.docx]

**Supplementary Table S1: Complete ICD-9/10 Diagnostic Code Mappings for Clinical Outcomes.**

This table presents a comprehensive list of ICD-9 and ICD-10 codes used to define the 14 clinical outcomes evaluated in this study. At the patient-encounter level, each outcome was treated as a distinct binary variable (present vs. absent). Because individual encounters could involve multiple concurrent diagnoses, these outcomes were analyzed as non-mutually exclusive.

| **Outcomes** | **Definition** | **ICD 9** | **ICD 10** |
| --- | --- | --- | --- |
| Sepsis | Diagnosis of sepsis or septic shock during ED or hospitalization | 038.0, 038.1, 038.10, 038.11, 038.12, 038.19, 038.2, 038.3, 038.40, 038.41, 038.42, 038.43, 038.44, 038.49, 038.8, 038.9, 995.91, 995.92, 785.52, 670.20, 670.22, 670.24 | A40.0, A40.1, A40.3, A40.8, A40.9,  A41.0, A41.01, A41.02, A41.1, A41.2, A41.3, A41.4, A41.50, A41.51, A41.52, A41.53, A41.59, A41.81, A41.89, A41.9,  R65.20, R65.21, R57.2,  T81.44XA, T81.44XD, T81.44XS,  O85, O03.37, O03.87, O04.87 |
| All-Cause Pneumonia  (Combination of bacterial + viral pneumonia codes) | Pneumonia of any etiology | 480.0, 480.1, 480.2, 480.3, 480.8, 480.9,  481,  482.0, 482.1, 482.2, 482.32, 482.39, 482.40, 482.41, 482.42, 482.49, 482.81, 482.82, 482.83, 482.84, 482.89, 482.9,  483.0, 483.1, 483.8,  484.1, 484.3, 484.5, 484.6, 484.7, 484.8,  485, 486,  487.0,  488.01, 488.11, 488.81 | J09.X1,  J10.00, J10.01, J10.08,  J11.00, J11.08,  J12.0, J12.1, J12.2, J12.3, J12.8, J12.81, J12.82, J12.89, J12.9,  J13, J14,  J15.0, J15.1, J15.2, J15.20, J15.21, J15.29, J15.3, J15.4, J15.5, J15.6, J15.7, J15.8, J15.9,  J16.0, J16.8,  J17,  J18.0, J18.1, J18.2, J18.8, J18.9 |
| Acute Respiratory Distress Syndrome (ARDS) | Diagnosis of ARDS during encounter | 518.82 | J80 |
| Chronic Obstructive Pulmonary Disease (COPD) Exacerbation | Acute exacerbation of chronic obstructive pulmonary disease | 491.21, 491.22 | J44.1, J44.0 |
| Acute Asthma Exacerbation | Acute worsening of asthma symptoms | 493.01, 493.02, 493.11, 493.12, 493.92 | J45.21, J45.31, J45.41, J45.51, J45.901 |
| COPD + Asthma  (Union of all COPD + asthma exacerbation codes) | Either COPD or asthma acute exacerbation | 491.21, 491.22, 493.01, 493.02, 493.11, 493.12, 493.92 | J44.1, J44.0, J45.21, J45.31, J45.41, J45.51, J45.901 |
| Acute Coronary Syndrome (ACS) | Acute ACS documented by ICD codes | 410.00, 410.01, 410.02,  410.10, 410.11, 410.12,  410.20, 410.21, 410.22,  410.30, 410.31, 410.32,  410.40, 410.41, 410.42,  410.50, 410.51, 410.52,  410.60, 410.61, 410.62,  410.70, 410.71, 410.72,  410.80, 410.81, 410.82,  410.90, 410.91, 410.92,  411.1 | I20.0,  I21.01, I21.02, I21.09, I21.11, I21.19, I21.21, I21.29, I21.3, I21.4, I21.9,  I22.0, I22.1, I22.2, I22.8, I22.9,  I23.0, I23.1, I23.2, I23.3, I23.4, I23.5, I23.6, I23.7, I23.8,  I24.0, I24.1, I24.8, I24.81, I24.89, I24. |
| Acute Heart Failure (AHF) | Acute decompensated heart failure | 428.0, 428.21, 428.23, 428.31, 428.33, 428.41, 428.43 | I50.21, I50.23, I50.31, I50.33, I50.41, I50.43, I50.811, I50.813, I50.9 |
| Stroke | Ischemic or hemorrhagic stroke | 430, 431, 432.0, 432.1, 432.9, 433.01, 433.11, 434.01, 434.11, 436 | I60.0, I60.1, I60.2, I60.3, I60.4, I60.5, I60.6, I60.7, I60.8, I60.9,  I61.0, I61.1, I61.2, I61.3, I61.4, I61.5, I61.6, I61.8, I61.9,  I62.0, I62.1, I62.9,  I63.0, I63.1, I63.2, I63.3, I63.4, I63.5, I63.6, I63.8, I63.9,  I64 |
| Acute Kidney Injury (AKI) | Acute kidney injury | 584.5, 584.6, 584.7, 584.8, 584.9, 586 | N17.0, N17.1, N17.2, N17.8, N17.9 |
| Pulmonary Embolism (PE) |  | 415.11, 415.12, 415.13, 415.19, 416.2 | I26.01, I26.02, I26.09, I26.90, I26.92, I26.93, I26.94, I26.99, I27.82, I27.24 |
| Hospitalization | Admission from ED to the inpatient stay | N/A | N/A |
| Critical outcomes | ICU admission, mechanical ventilation, or mortality | N/A | N/A |
| 72-hour ED Revisit | Return to ED within 72 hours of discharge | N/A | N/A |

**Supplementary Table S2: Clinical Narrative Sample Sizes Across Experimental Cohorts.**

This table provides the counts of clinical narratives used in each part of the experiments.

| **Training** | **Internal Testing** | **External Validation** |
| --- | --- | --- |
| 7,959,308 | 2,347,180 | 448,804 |


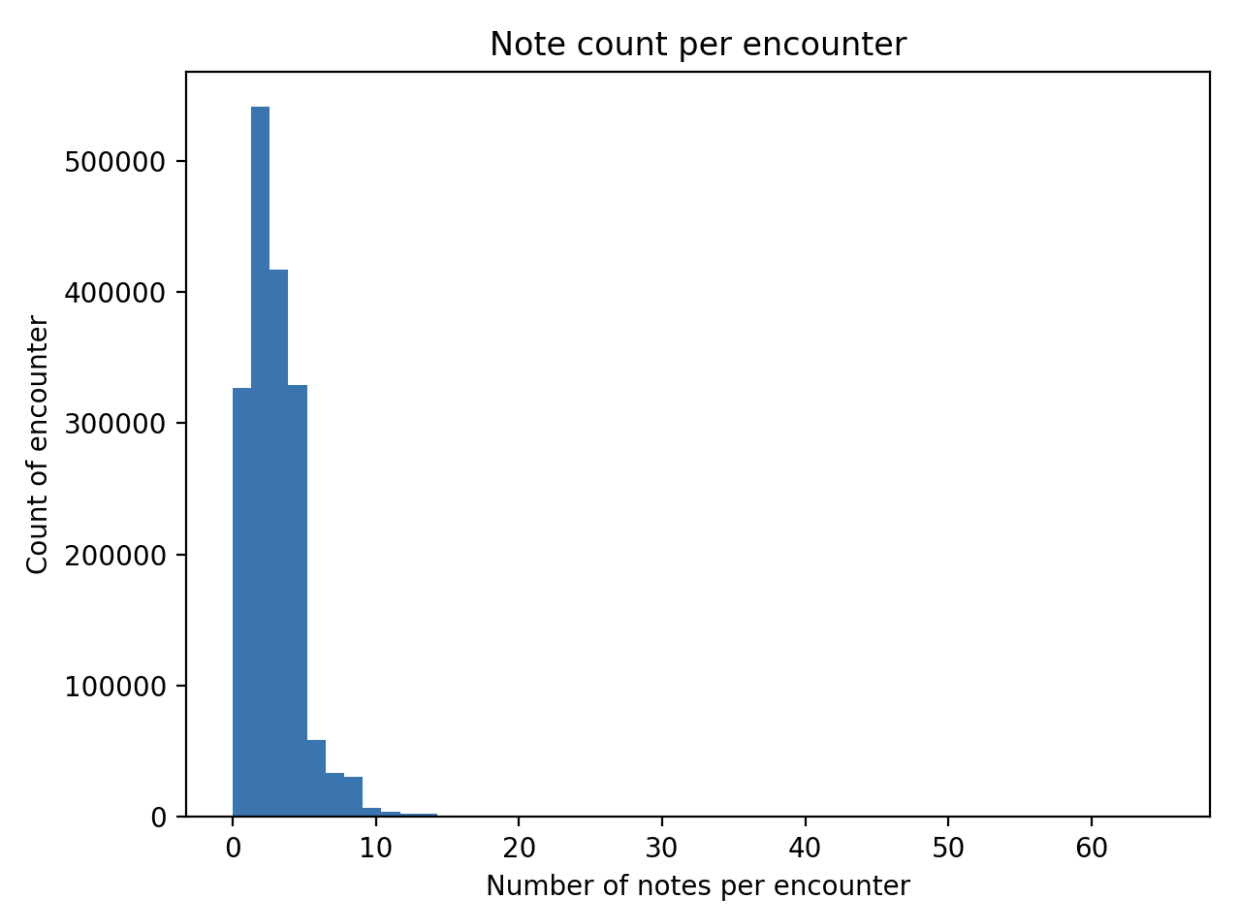


**Supplementary Figure S1: Distribution of Clinical Note Counts per Encounter.**

This histogram illustrates the frequency distribution of clinical notes per patient encounter, using data available at the 6-hour time point as a representative example. Because the vast majority of encounters contain fewer than 80 notes, establishing a sequence limit of 100 notes per encounter captures nearly the entire data distribution while optimizing computational efficiency.

**Supplementary Table S3: Performance Comparison of the Multimodal Model and single-modality baselines at the 1-hour post-arrival window.**

This table presents the AUROC and AUPRC metrics for the multimodal fusion model, along with the text-only, vitals-only, and static-structured baseline models, evaluated on the UMN internal test cohort. Values in parentheses denote 95% confidence intervals. Overall performance is summarized using macro-average metrics, followed by task-specific results for each clinical outcome.

|  | **Multimodal** | | **Text** | | **Vitals** | | **Static Variables** | |
| --- | --- | --- | --- | --- | --- | --- | --- | --- |
| **Task** | **AUROC** | **AUPRC** | **AUROC** | **AUPRC** | **AUROC** | **AUPRC** | **AUROC** | **AUPRC** |
| **Macro Average** | **0.928 (0.927-**  **0.929)** | **0.381 (0.379-**  **0.384)** | 0.891 (0.890-  0.892) | 0.294 (0.291-  0.296) | 0.760 (0.758-  0.762) | 0.106 (0.105-  0.107) | 0.879 (0.878-  0.881) | 0.241 (0.239-  0.244) |
| **3-Day ED revisit** | **0.678 (0.675-**  **0.680)** | **0.126 (0.123-**  **0.128)** | 0.651 (0.649-  0.654) | 0.110 (0.109-  0.113) | 0.562 (0.560-  0.566) | 0.065 (0.064-  0.066) | 0.629 (0.626-  0.632) | 0.096 (0.094-  0.097) |
| **Hospitalization** | **0.873 (0.872-**  **0.874)** | **0.636 (0.633-**  **0.638)** | 0.847 (0.846-  0.848) | 0.599 (0.596-  0.601) | 0.673 (0.671-  0.674) | 0.366 (0.363-  0.369) | 0.783 (0.782-  0.785) | 0.464 (0.461-  0.467) |
| **Critical Outcome** | **0.942 (0.939-**  **0.945)** | **0.096 (0.088-**  **0.105)** | 0.919 (0.915-  0.923) | 0.075 (0.069-  0.082) | 0.840 (0.832-  0.848) | 0.045 (0.042-  0.049) | 0.872 (0.867-  0.877) | 0.027 (0.025-  0.030) |
| **Sepsis** | **0.932 (0.931-**  **0.933)** | **0.410 (0.402-**  **0.417)** | 0.902 (0.900-  0.904) | 0.328 (0.321-  0.335) | 0.827 (0.824-  0.830) | 0.238 (0.231-  0.244) | 0.829 (0.826-  0.832) | 0.166 (0.161-  0.171) |
| **Chronic Obstructive Pulmonary Disease (COPD) Exacerbations** | **0.980 (0.979-**  **0.981)** | **0.590 (0.579-**  **0.598)** | 0.946 (0.944-  0.948) | 0.492 (0.482-  0.501) | 0.838 (0.834-  0.842) | 0.128 (0.123-  0.134) | 0.967 (0.966-  0.968) | 0.377 (0.367-  0.387) |
| **Acute Coronary Syndrome (ACS)** | **0.944 (0.943-**  **0.946)** | **0.406 (0.398-**  **0.415)** | 0.897 (0.895-  0.899) | 0.233 (0.227-  0.240) | 0.730 (0.726-  0.734) | 0.069 (0.067-  0.072) | 0.917 (0.915-  0.918) | 0.316 (0.308-  0.325) |
| **Stroke** | **0.973 (0.972-**  **0.975)** | **0.530 (0.519-**  **0.541)** | 0.922 (0.920-  0.925) | 0.367 (0.357-  0.377) | 0.678 (0.673-  0.683) | 0.030 (0.029-  0.031) | 0.956 (0.955-  0.958) | 0.266 (0.257-  0.275) |
| **Acute Respiratory Distress Syndrome (ARDS)** | **0.932 (0.922-**  **0.942)** | **0.030 (0.020-**  **0.045)** | 0.911 (0.899-  0.923) | 0.020 (0.014-  0.030) | 0.799 (0.775-  0.823) | 0.004 (0.004-  0.006) | 0.843 (0.825-  0.861) | 0.004 (0.004-  0.006) |
| **Acute Kidney Injury (AKI)** | **0.902 (0.900-**  **0.903)** | **0.372 (0.367-**  **0.378)** | 0.863 (0.861-  0.865) | 0.304 (0.299-  0.309) | 0.731 (0.728-  0.734) | 0.163 (0.160-  0.167) | 0.849 (0.848-  0.851) | 0.223 (0.220-  0.227) |
| **Pneumonia** | **0.922 (0.920-**  **0.923)** | **0.365 (0.358-**  **0.372)** | 0.904 (0.902-  0.906) | 0.340 (0.334-  0.347) | 0.800 (0.797-  0.803) | 0.179 (0.174-  0.184) | 0.848 (0.846-  0.851) | 0.203 (0.198-  0.208) |
| **Acute Asthma Exacerbations** | **0.981 (0.981-**  **0.983)** | **0.615 (0.602-**  **0.627)** | 0.944 (0.940-  0.947) | 0.508 (0.494-  0.522) | 0.755 (0.749-  0.761) | 0.046 (0.043-  0.049) | 0.967 (0.965-  0.968) | 0.348 (0.335-  0.360) |
| **Acute Heart Failure (AHF)** | **0.967 (0.967-**  **0.968)** | **0.569 (0.562-**  **0.576)** | 0.905 (0.903-  0.907) | 0.399 (0.392-  0.407) | 0.772 (0.769-  0.776) | 0.118 (0.115-  0.121) | 0.957 (0.956-  0.958) | 0.466 (0.459-  0.473) |
| **Acute Exacerbation of either COPD or Asthma** | **0.980 (0.979-**  **0.980)** | **0.669 (0.661-**  **0.677)** | 0.946 (0.944-  0.948) | 0.567 (0.559-  0.576) | 0.801 (0.798-  0.805) | 0.147 (0.142-  0.151) | 0.962 (0.961-  0.963) | 0.466 (0.457-  0.475) |
| **Pulmonary Embolism (PE)** | **0.976 (0.974-**  **0.978)** | **0.471 (0.457-**  **0.484)** | 0.861 (0.856-  0.866) | 0.157 (0.147-  0.167) | 0.696 (0.688-  0.704) | 0.020 (0.019-  0.022) | 0.968 (0.966-  0.971) | 0.369 (0.353-  0.382) |
